# Supplementary material
Source: PubMed Central journal article supplement (PMC3365719)
Supplement: supp_M111.297960_jbc.M111.297960-1.pdf [file supp_M111.297960_jbc.M111.297960-1.pdf]

**Supplemental Figure S 1. Mascot search results.**

The top three proteins identified by the Mascot search are presented with their scores, masses and matched peptides. Lmo4, isoform CRA\_b (Rattus norvegicus, gi:149026131) was the top scored protein with a 74% sequence coverage. The protein sequence of Lmo4 (isoform CRA\_b) is shown with its matched peptides in bold letters.

# Mascot Search Results

**Top Score :** gi|149026131, LIM domain only 4, isoform CRA\_b [Rattus norvegicus]

**Mass:** 8823, **Score:** 89, Number of mass values matched: 5

| Observed mass | Start-End | Peptide                    |
|---------------|-----------|----------------------------|
| 1995.0880     | 2 - 21    | M.VNPGSSSQPPPVTAGSLSWK.R   |
| 2144.1190     | 30 - 46   | K.IADRFLLYAMDSYWHSR.C      |
| 2151.1050     | 2 - 22    | M.VNPGSSSQPPPVTAGSLSWKR.C  |
| 2226.0040     | 47 - 67   | R.CLKSCCQAQLGDIGTSCYTK.S   |
| 2284.1960     | 1 - 22    | -.MVNPGSSSQPPPVTAGSLSWKR.C |

**No match to:** 1826.9260, 2111.0900, 2113.0660

Matched peptides shown in **Bold** - Sequence Coverage: **74%**

**1 MVNPGSSSQ PPPVTAGSLW KRCAGCGGKI ADRFLLYAMD SYWHSRCLKC**  
**51 SCCQAQLGDI GTSCYTKSGM ILCRNDYIRV L**

**2:** gi|5803072, LIM domain transcription factor LMO4 [Homo sapiens]

**Mass:** 17982, **Score:** 73, **Matches:** 5

| Observed mass | Start-End | Peptide                    |
|---------------|-----------|----------------------------|
| 1995.0880     | 2 - 21    | M.VNPGSSSQPPPVTAGSLSWK.R   |
| 2144.1190     | 30 - 46   | K.IADRFLLYAMDSYWHSR.C      |
| 2151.1050     | 2 - 22    | M.VNPGSSSQPPPVTAGSLSWKR.C  |
| 2226.0040     | 47 - 67   | R.CLKSCCQAQLGDIGTSCYTK.S   |
| 2284.1960     | 1 - 22    | -.MVNPGSSSQPPPVTAGSLSWKR.C |

**No match to:** 1826.9260, 2111.0900, 2113.0660

**3:** gi|169642489, Pgm2 protein [Rattus norvegicus]

**Mass:** 69015, **Score:** 58, **Matches:** 6

| Observed mass | Start-End | Peptide                  |
|---------------|-----------|--------------------------|
| 1826.9260     | 36 - 52   | R.NPLTSESVKQLLAEGNK.E    |
| 1995.0880     | 576 - 593 | K.YYAELCAPPGNSDPEQLK.R   |
| 2113.0660     | 258 - 276 | K.FVHTSVHGVGHEFVQSAFK.A  |
| 2144.1190     | 1 - 22    | -.MAAATPTQTPEASGLGMDAR.L |
| 2151.1050     | 576 - 594 | K.YYAELCAPPGNSDPEQLKR.E  |
| 2284.1960     | 594 - 612 | K.RELDELVGAIEEHFFQPQK.Y  |

**No match to:** 2111.0900, 2226.0040
