# Supplementary material
Source: PubMed Central journal article supplement (PMC3365719)
Supplement: supp_M111.297960_jbc.M111.297960-2.pdf [file supp_M111.297960_jbc.M111.297960-2.pdf]

**Supplemental Fig S 2. Orbitrap/ETD spectra of two nitrated tryptic peptide domains in Lmo4 protein.**

A) The ETD spectrum of peptide CSCCQAQLGDIGTSCYTKSGMILCR is indicative of the nitration of Tyr-65. B) The ETD spectrum of peptide NDYIRLFGNSGACSGQSIPASELVMR is indicative of the nitration of Tyr-77.

**A**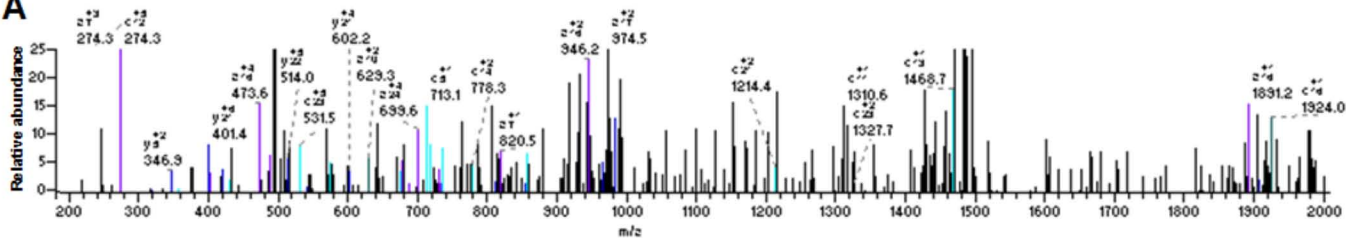**B**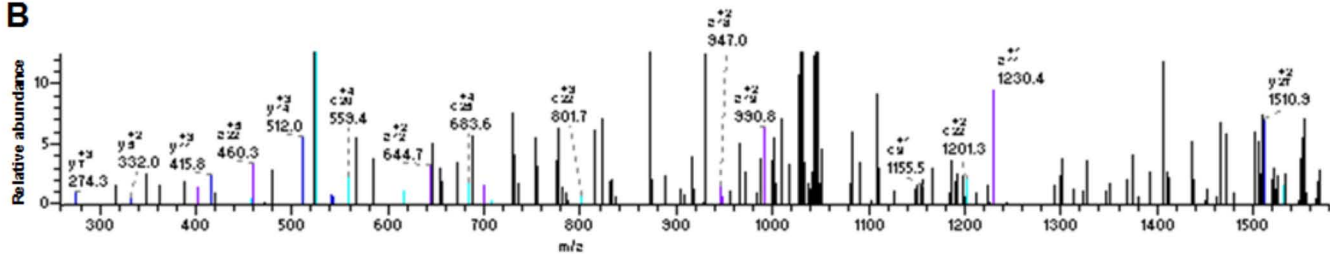

SD Figure 2
